# Supplementary material
Source: PubMed Central journal article supplement (PMC3067432)

Figure S1. A schematic diagram showing insertional mutagenesis strategy for constructing the *nifJ* mutant (a). Agarose gel electrophoresis indicates a 1.4-kbp increase in the size of the amplicon in the *nifJ* mutant that has incorporated the antibiotic gene cartridge (*aphA2*) conferring kanamycin resistance (b).

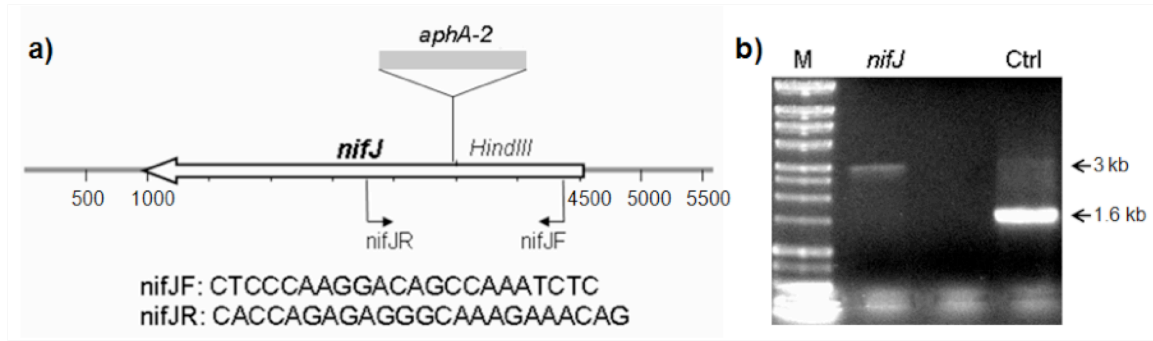

Supplement: supp_77_7_2435__1.pdf [file supp_77_7_2435__1.pdf]
