# Supplementary material
Source: PubMed Central journal article supplement (PMC3067432)

Figure S2. Fast Repetition Rate Fluorometry (FRRF) of WT and *nifJ* cells averaged over 12 h increments. 0-12h  $\square$ ; 12-24h  $\circ$ ; 24-36h  $\Delta$ ; 36-48h  $\nabla$ . The  $F_v/F_m$  of both cultures remains steady for 24 h of the FRRF experiment. The WT cultures continue to remain steady ( $F_v/F_m = 0.389 \pm 0.002$  to  $0.384 \pm 0.001$ ) over 48 hours, while the  $F_v/F_m$  decreases from  $0.409 \pm 0.002$  over the first 12 h to  $0.389 \pm 0.002$  for the 36-48 h increment.

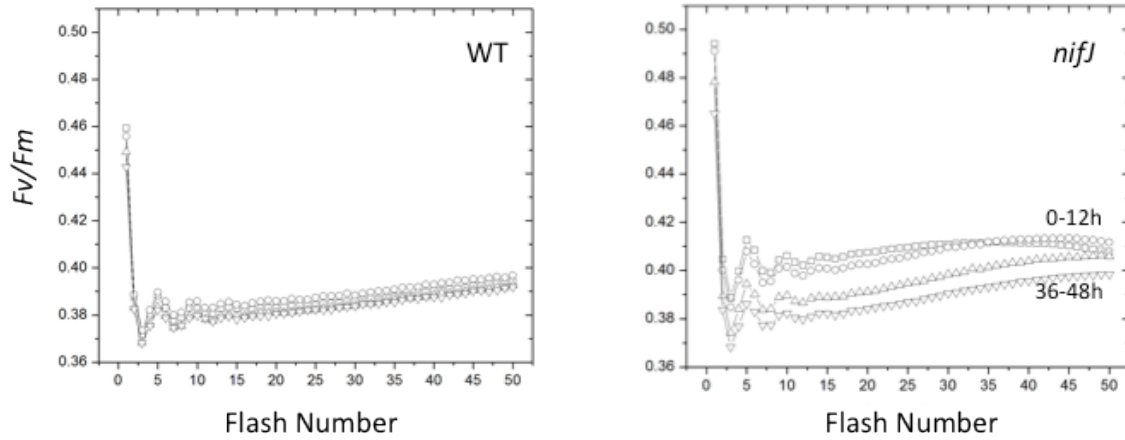

Supplement: supp_77_7_2435__2.pdf [file supp_77_7_2435__2.pdf]
